# Supplementary material
Source: publisher figshare collection journal article supplement (https://acs.figshare.com/ndownloader/files/4762030)
Supplement: Supplementary file 1 [file 4762030]

# Supporting Information

## Hollow $\text{PbWO}_4$ Nanospindles via a Facile Sonochemical Route

*Jun Geng, Jun-Jie Zhu\*, Du-Juan Lu, and Hong-Yuan Chen*

### 1. Comparative experimental results under vigorous electric stirring

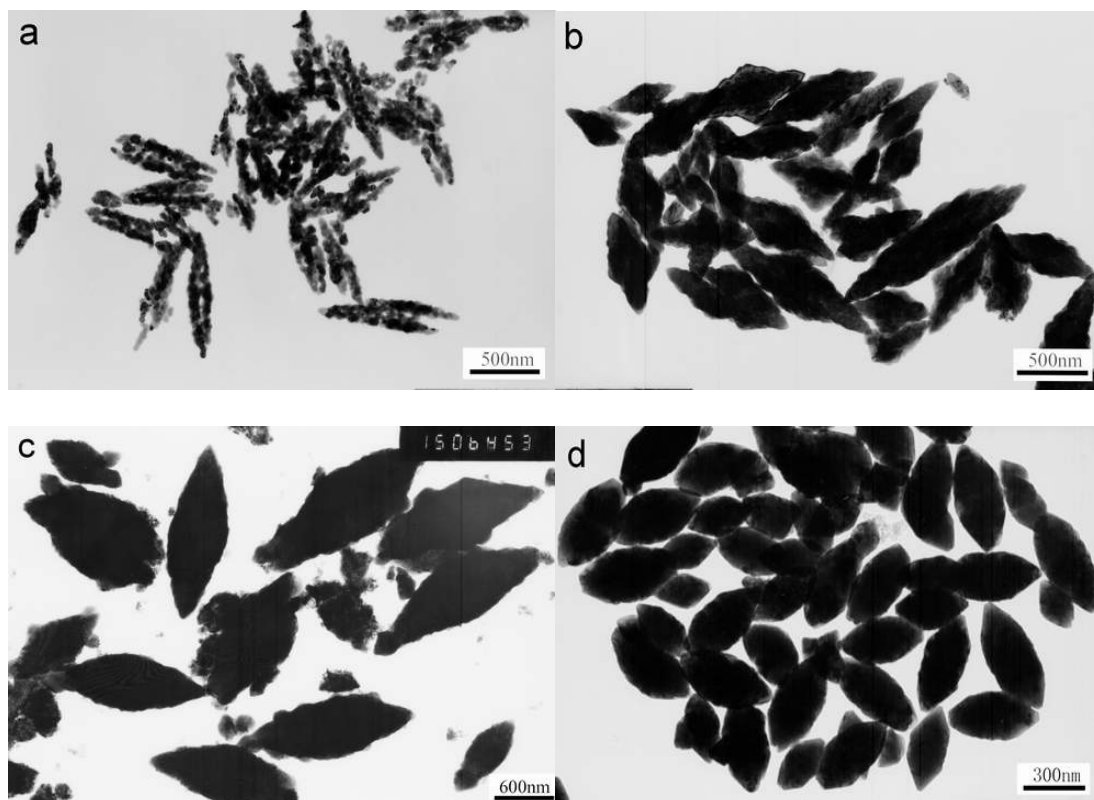

Figure S1. TEM images of  $\text{PbWO}_4$  sample prepared under vigorous electric stirring in different P123 concentration systems: (a)  $2 \text{ g}\cdot\text{L}^{-1}$ , (b)  $3 \text{ g}\cdot\text{L}^{-1}$ , (c)  $4 \text{ g}\cdot\text{L}^{-1}$ , and (d)  $5 \text{ g}\cdot\text{L}^{-1}$ .

### 2. Effect of sonication time on the final products

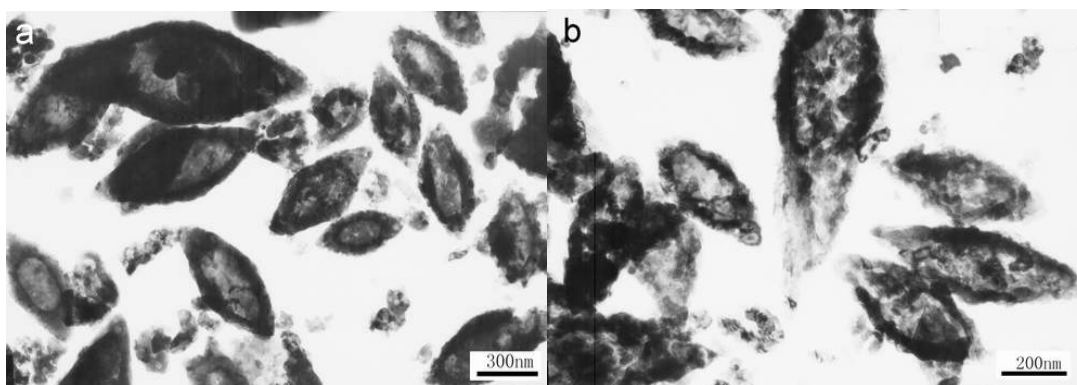

Figure S2. TEM images of samples obtained after sonication for (a) 60 min, and (b) 120 min.

### 3. Effect of concentrations of $\text{Pb}(\text{CH}_3\text{COO})_2$ and $\text{Na}_2\text{WO}_4$

The experimental results show that the uniform hollow spindles could only be obtained at the concentration of 0.5-1 M. When the concentration of  $\text{Pb}(\text{CH}_3\text{COO})_2$  and  $\text{Na}_2\text{WO}_4$  were changed to 0.1 M (1/5 of optimal concentration), the product was a mixture of hollow spindles and nanorods, and the yield was much lower (Figure S3a). When the concentration of  $\text{Pb}(\text{CH}_3\text{COO})_2$  and  $\text{Na}_2\text{WO}_4$  were changed to 2 M (4 times of optimal concentration), the morphology changed to be small nanoparticles together with irregular aggregation (Figure S3b). We think when the concentrations of  $\text{Pb}(\text{CH}_3\text{COO})_2$  and  $\text{Na}_2\text{WO}_4$  were relatively low (the P123 concentration was relatively higher), the copolymer might also work as capping reagent to restrict the growth of  $\text{PbWO}_4$  crystals resulting the formation of nanorods. While under higher reactant concentration, nucleation occurred at an outburst speed right after the reaction solutions were mixed, leading to a large quantity of  $\text{PbWO}_4$  precipitation, so small nanoparticles with their aggregation were obtained under this situation.

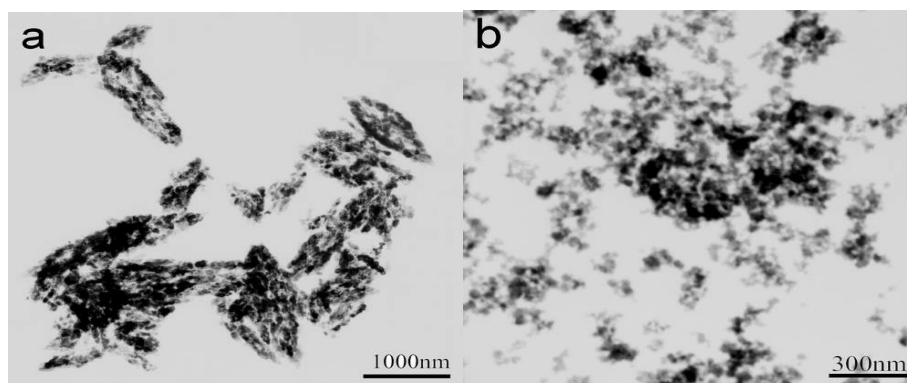

Figure S3. TEM images of samples obtained with the concentration of  $\text{Pb}(\text{CH}_3\text{COO})_2$  and  $\text{Na}_2\text{WO}_4$  of (a) 0.1 M, and (b) 2 M.
